# Supplementary material
Source: PubMed Central journal article supplement (PMC5312261)
Supplement: NIHMS832472-supplement-1.pdf [file NIHMS832472-supplement-1.pdf]

## **Inventory for Supplemental Information**

- **Supplemental Experimental Procedures**
- **Supplemental Figures and Figure Legends**
  - **Figure S1, related to Figure 1**
  - **Figure S2, related to Figure 4**
  - **Figure S3, related to Figure 4**
  - **Figure S4, related to Figure 5**
  - **Figure S5, related to Figure 6**
  - **Figure S6, related to Figure 7**
